# Supplementary material
Source: PubMed Central journal article supplement (PMC2373994)
Supplement: f-64-00039-sup1.pdf [file f-64-00039-sup1.pdf]

**Supplementary table 1**

List of conditions in the DNA-Protein Complex crystallization Screen kit

| DPCS | Commercial Screening Kit |      | Conditions       |             |      |          |                    |
|------|--------------------------|------|------------------|-------------|------|----------|--------------------|
|      | No.                      | Name | No.              | Precipitant | Salt | Additive | Buffer             |
| 1    | Pegs                     | 7    | 40% PEG 200      |             |      |          | 0.1 M MES pH 6.5   |
| 2    | Pegs                     | 8    | 30% PEG 300      |             |      |          | 0.1 M MES pH 6.5   |
| 3    | Pegs                     | 9    | 30% PEG 400      |             |      |          | 0.1 M MES pH 6.5   |
| 4    | Pegs                     | 10   | 25% PEG 550 MME  |             |      |          | 0.1 M MES pH 6.5   |
| 5    | Pegs                     | 11   | 25% PEG 1000     |             |      |          | 0.1 M MES pH 6.5   |
| 6    | Pegs                     | 12   | 25% PEG 2000 MME |             |      |          | 0.1 M MES pH 6.5   |
| 7    | Pegs                     | 13   | 40% PEG 200      |             |      |          | 0.1 M HEPES pH 7.5 |
| 8    | Pegs                     | 14   | 30% PEG 300      |             |      |          | 0.1 M HEPES pH 7.5 |
| 9    | Pegs                     | 15   | 30% PEG 400      |             |      |          | 0.1 M HEPES pH 7.5 |
| 10   | Pegs                     | 16   | 25% PEG 550 MME  |             |      |          | 0.1 M HEPES pH 7.5 |
| 11   | Pegs                     | 18   | 25% PEG 2000 MME |             |      |          | 0.1 M HEPES pH 7.5 |
| 12   | Pegs                     | 19   | 40% PEG 200      |             |      |          | 0.1 M Tris pH 8.5  |
| 13   | Pegs                     | 20   | 30% PEG 300      |             |      |          | 0.1 M Tris pH 8.5  |
| 14   | Pegs                     | 21   | 30% PEG 400      |             |      |          | 0.1 M Tris pH 8.5  |

|    |      |    |                  |                           |                    |
|----|------|----|------------------|---------------------------|--------------------|
| 15 | Pegs | 22 | 25% PEG 550 MME  |                           | 0.1 M Tris pH 8.5  |
| 16 | Pegs | 23 | 25% PEG 1000     |                           | 0.1 M Tris pH 8.5  |
| 17 | Pegs | 24 | 25% PEG 2000 MME |                           | 0.1 M Tris pH 8.5  |
| 18 | Pegs | 31 | 25% PEG 3000     |                           | 0.1 M MES pH 6.5   |
| 19 | Pegs | 32 | 25% PEG 4000     |                           | 0.1 M MES pH 6.5   |
| 20 | Pegs | 33 | 25% PEG 6000     |                           | 0.1 M MES pH 6.5   |
| 21 | Pegs | 34 | 25% PEG 8000     |                           | 0.1 M MES pH 6.5   |
| 22 | Pegs | 35 | 20% PEG 10000    |                           | 0.1 M MES pH 6.5   |
| 23 | Pegs | 36 | 15% PEG 20000    |                           | 0.1 M MES pH 6.5   |
| 24 | Pegs | 37 | 25% PEG 3000     |                           | 0.1 M HEPES pH 7.5 |
| 25 | Pegs | 38 | 25% PEG 4000     |                           | 0.1 M HEPES pH 7.5 |
| 26 | Pegs | 39 | 25% PEG 6000     |                           | 0.1 M HEPES pH 7.5 |
| 27 | Pegs | 40 | 25% PEG 8000     |                           | 0.1 M HEPES pH 7.5 |
| 28 | Pegs | 42 | 15% PEG 20000    |                           | 0.1 M HEPES pH 7.5 |
| 29 | Pegs | 43 | 25% PEG 3000     |                           | 0.1 M Tris pH 8.5  |
| 30 | Pegs | 44 | 25% PEG 4000     |                           | 0.1 M Tris pH 8.5  |
| 31 | Pegs | 45 | 25% PEG 6000     |                           | 0.1 M Tris pH 8.5  |
| 32 | Pegs | 46 | 25% PEG 8000     |                           | 0.1 M Tris pH 8.5  |
| 33 | Pegs | 47 | 20% PEG 10000    |                           | 0.1 M Tris pH 8.5  |
| 34 | Pegs | 48 | 15% PEG 20000    |                           | 0.1 M Tris pH 8.5  |
| 35 | Pegs | 49 | 20% PEG 3350     | 0.2 M NaF                 |                    |
| 36 | Pegs | 50 | 20% PEG 3350     | 0.2 M KF                  |                    |
| 37 | Pegs | 51 | 20% PEG 3350     | 0.2 M (NH <sub>4</sub> )F |                    |

|    |      |    |              |                                          |
|----|------|----|--------------|------------------------------------------|
| 38 | Pegs | 52 | 20% PEG 3350 | 0.2 M LiCl                               |
| 39 | Pegs | 53 | 20% PEG 3350 | 0.2 M MgCl <sub>2</sub>                  |
| 40 | Pegs | 54 | 20% PEG 3350 | 0.2 M NaCl                               |
| 41 | Pegs | 55 | 20% PEG 3350 | 0.2 M CaCl <sub>2</sub>                  |
| 42 | Pegs | 56 | 20% PEG 3350 | 0.2 M KCl                                |
| 43 | Pegs | 58 | 20% PEG 3350 | 0.2 M NaI                                |
| 44 | Pegs | 59 | 20% PEG 3350 | 0.2 M KI                                 |
| 45 | Pegs | 60 | 20% PEG 3350 | 0.2 M (NH <sub>4</sub> )I                |
| 46 | Pegs | 62 | 20% PEG 3350 | 0.2 M K(SCN)                             |
| 47 | Pegs | 63 | 20% PEG 3350 | 0.2 M Li(NO <sub>2</sub> )               |
| 48 | Pegs | 64 | 20% PEG 3350 | 0.2 M Mg(NO <sub>2</sub> ) <sub>2</sub>  |
| 49 | Pegs | 65 | 20% PEG 3350 | 0.2 M Na(NO <sub>2</sub> )               |
| 50 | Pegs | 70 | 20% PEG 3350 | 0.2 M K formate                          |
| 51 | Pegs | 72 | 20% PEG 3350 | 0.2 M Li acetate                         |
| 52 | Pegs | 73 | 20% PEG 3350 | 0.2 M Mg acetate                         |
| 53 | Pegs | 75 | 20% PEG 3350 | 0.2 M Na acetate                         |
| 54 | Pegs | 76 | 20% PEG 3350 | 0.2 M Ca acetate                         |
| 55 | Pegs | 77 | 20% PEG 3350 | 0.2 M K acetate                          |
| 56 | Pegs | 78 | 20% PEG 3350 | 0.2 M (NH <sub>4</sub> ) acetate         |
| 57 | Pegs | 79 | 20% PEG 3350 | 0.2 M Li <sub>2</sub> (SO <sub>4</sub> ) |
| 58 | Pegs | 80 | 20% PEG 3350 | 0.2 M Mg(SO <sub>4</sub> )               |
| 59 | Pegs | 81 | 20% PEG 3350 | 0.2 M Na <sub>2</sub> (SO <sub>4</sub> ) |
| 60 | Pegs | 82 | 20% PEG 3350 | 0.2 M K <sub>2</sub> (SO <sub>4</sub> )  |

|    |                  |    |              |                                                          |                         |
|----|------------------|----|--------------|----------------------------------------------------------|-------------------------|
| 61 | Pegs             | 83 | 20% PEG 3350 | 0.2 M (NH <sub>4</sub> ) <sub>2</sub> (SO <sub>4</sub> ) |                         |
| 62 | Pegs             | 84 | 20% PEG 3350 | 0.2 M Na <sub>2</sub> tartate                            |                         |
| 63 | Pegs             | 86 | 20% PEG 3350 | 0.2 M (NH <sub>4</sub> ) <sub>2</sub> tartate            |                         |
| 64 | Pegs             | 87 | 20% PEG 3350 | 0.2 M Na phosphate                                       |                         |
| 65 | Pegs             | 88 | 20% PEG 3350 | 0.2 M Na <sub>2</sub> phosphate                          |                         |
| 66 | Pegs             | 89 | 20% PEG 3350 | 0.2 M K phosphate                                        |                         |
| 67 | Pegs             | 90 | 20% PEG 3350 | 0.2 M K <sub>2</sub> phosphate                           |                         |
| 68 | Pegs             | 91 | 20% PEG 3350 | 0.2 M (NH <sub>4</sub> ) phosphate                       |                         |
| 69 | Pegs             | 92 | 20% PEG 3350 | 0.2 M (NH <sub>4</sub> ) <sub>2</sub> phosphate          |                         |
| 70 | Pegs             | 93 | 20% PEG 3350 | 0.2 M Li <sub>3</sub> citrate                            |                         |
| 71 | Crystal Screen I | 6  | 30% PEG 4000 | 0.2 M MgCl <sub>2</sub>                                  | 0.1 M Tris pH 8.5       |
| 72 | Crystal Screen I | 9  | 30% PEG 4000 | 0.2 M (NH <sub>4</sub> ) acetate                         | 0.1 M Mcitrate pH 5.6   |
| 73 | Crystal Screen I | 13 | 30% PEG 400  | 0.2 M Na citrate                                         | 0.1 M Tris pH 8.5       |
| 74 | Crystal Screen I | 14 | 28% PEG 400  | 0.2 M CaCl <sub>2</sub>                                  | 0.1 M HEPES pH 7.5      |
| 75 | Crystal Screen I | 15 | 30% PEG 8000 | 0.2 M (NH <sub>4</sub> ) <sub>2</sub> (SO <sub>2</sub> ) | 0.1 M cacodylate pH 6.5 |
| 76 | Crystal Screen I | 17 | 30% PEG 4000 | 0.2 M Li <sub>2</sub> (SO <sub>4</sub> )                 | 0.1 M Tris pH 8.5       |
| 77 | Crystal Screen I | 18 | 20% PEG 8000 | 0.2 M Mg acetate                                         | 0.1 M cacodylate pH 6.5 |
| 78 | Crystal Screen I | 22 | 30% PEG 4000 | 0.2 M Na acetate                                         | 0.1 M Tris pH 8.5       |
| 79 | Crystal Screen I | 23 | 30% PEG 400  | 0.2 M MgCl <sub>2</sub>                                  | 0.1 M HEPES pH 7.5      |
| 80 | Crystal Screen I | 28 | 30% PEG 8000 | 0.2 M Na acetate                                         | 0.1 M cacodylate pH 6.5 |
| 81 | Crystal Screen I | 30 | 30% PEG 8000 | 0.2 M (NH <sub>4</sub> ) <sub>2</sub> (SO <sub>2</sub> ) |                         |
| 82 | Crystal Screen I | 31 | 30% PEG 4000 | 0.2 M (NH <sub>4</sub> ) <sub>2</sub> (SO <sub>2</sub> ) |                         |
| 83 | Crystal Screen I | 36 | 8% PEG 8000  |                                                          | 0.1 M Tris pH 8.5       |

|     |                     |    |                  |                                                          |                    |                         |
|-----|---------------------|----|------------------|----------------------------------------------------------|--------------------|-------------------------|
| 84  | Crystal Screen I    | 39 | 2% PEG 400       | 2 M (NH <sub>4</sub> ) <sub>2</sub> (SO <sub>2</sub> )   |                    | 0.1 M HEPES pH 7.5      |
| 85  | Crystal Screen I    | 40 | 20% PEG 4000     |                                                          | 20% 2-propanol     | 0.1 M citrate pH 5.6    |
| 86  | Crystal Screen I    | 41 | 20% PEG 4000     |                                                          | 10% 2-propanol     | 0.1 M HEPES pH 7.5      |
| 87  | Crystal Screen I    | 42 | 20% PEG 8000     | 0.05 M K phosphate                                       |                    |                         |
| 88  | Crystal Screen I    | 43 | 30% PEG 1500     |                                                          |                    |                         |
| 89  | Crystal Screen I    | 46 | 18% PEG 8000     | 0.2 M Ca acetate                                         |                    | 0.1 M cacodylate pH 6.5 |
| 90  | Crystal Screen I    | 49 | 2% PEG 8000      | 1 M Li <sub>2</sub> (SO <sub>4</sub> )                   |                    |                         |
| 91  | Crystal Screen I    | 50 | 15% PEG 8000     | 0.5 M Li <sub>2</sub> (SO <sub>4</sub> )                 |                    |                         |
| 92  | Crystal Screen II   | 7  | 10% PEG 8000     |                                                          | 10% PEG 1000       |                         |
| 93  | Crystal Screen II   | 26 | 30% PEG 5000 MME | 0.2 M (NH <sub>4</sub> ) <sub>2</sub> (SO <sub>2</sub> ) | 5% MPD             | 0.1 M MES pH 6.5        |
| 94  | Crystal Screen II   | 37 | 10% PEG 8000     |                                                          | 8% Ethylene Glycol | 0.1 M HEPES pH 7.5      |
| 95  | Crystal Screen II   | 38 | 20% PEG 10000    |                                                          |                    | 0.1 M HEPES pH 7.5      |
| 96  | Crystal Screen II   | 46 | 20% PEG 550 MME  | 0.1 M NaCl                                               |                    | 0.1 M Bicine pH 9.0     |
| 97  | Crystal Screen II   | 48 | 10% PEG 20000    |                                                          | 2% Dioxane         | 0.1 M Bicine pH 9.0     |
| 98  | Crystal Screen Lite | 6  | 15% PEG 4000     | 0.2 M MgCl <sub>2</sub>                                  |                    | 0.1 M Tris pH 8.5       |
| 99  | Crystal Screen Lite | 13 | 15% PEG 400      | 0.2 M Na <sub>3</sub> citrate                            |                    | 0.1 M Tris pH 8.5       |
| 100 | Crystal Screen Lite | 14 | 14% PEG 400      | 0.2 M CaCl <sub>2</sub>                                  |                    | 0.1 M HEPES pH 7.5      |
| 101 | Crystal Screen Lite | 15 | 15% PEG 8000     | 0.2 M (NH <sub>4</sub> ) <sub>2</sub> (SO <sub>2</sub> ) |                    | 0.1 M cacodylate pH 6.5 |
| 102 | Crystal Screen Lite | 17 | 15% PEG 4000     | 0.2 M Li <sub>2</sub> (SO <sub>4</sub> )                 |                    | 0.1 M Tris pH 8.5       |
| 103 | Crystal Screen Lite | 18 | 10% PEG 8000     | 0.2 M Mg acetate                                         |                    | 0.1 M cacodylate pH 6.5 |
| 104 | Crystal Screen Lite | 22 | 15% PEG 4000     | 0.2 M Na acetate                                         |                    | 0.1 M Tris pH 8.5       |
| 105 | Crystal Screen Lite | 23 | 15% PEG 400      | 0.2 M MgCl <sub>2</sub>                                  |                    | 0.1 M HEPES pH 7.5      |
| 106 | Crystal Screen Lite | 28 | 15% PEG 8000     | 0.2 M Na acetate                                         |                    | 0.1 M cacodylate pH 6.5 |

|     |                     |    |               |                                      |                                        |
|-----|---------------------|----|---------------|--------------------------------------|----------------------------------------|
| 107 | Crystal Screen Lite | 30 | 15% PEG 8000  | 0.2 M $(\text{NH}_4)_2(\text{SO}_2)$ |                                        |
| 108 | Crystal Screen Lite | 31 | 15% PEG 4000  | 0.2 M $(\text{NH}_4)_2(\text{SO}_2)$ |                                        |
| 109 | Crystal Screen Lite | 36 | 4% PEG 8000   |                                      | 0.1 M Tris pH 8.5                      |
| 110 | Crystal Screen Lite | 39 | 2% PEG 400    | 1 M $(\text{NH}_4)_2(\text{SO}_2)$   | 0.1 M HEPES pH 7.5                     |
| 111 | Crystal Screen Lite | 40 | 10% PEG 4000  |                                      | 10% 2-propanol<br>0.1 M citrate pH 5.6 |
| 112 | Crystal Screen Lite | 41 | 10% PEG 4000  |                                      | 5% 2-propanol<br>0.1 M HEPES pH 7.5    |
| 113 | Crystal Screen Lite | 42 | 10% PEG 8000  | 0.05 M K phosphate                   |                                        |
| 114 | Crystal Screen Lite | 43 | 15% PEG 1500  |                                      |                                        |
| 115 | Crystal Screen Lite | 46 | 9% PEG 8000   | 0.2 M Ca acetate                     | 0.1 M cacodylate pH 6.5                |
| 116 | Crystal Screen Lite | 49 | 2% PEG 8000   | 0.5 M $\text{Li}_2(\text{SO}_4)$     |                                        |
| 117 | Crystal Screen Lite | 50 | 7.5% PEG 8000 | 0.5 M $\text{Li}_2(\text{SO}_4)$     |                                        |
| 118 | Grid Screen PEG 6K  | A2 | 5% PEG 6000   |                                      | 0.1 M citrate pH 5.0                   |
| 119 | Grid Screen PEG 6K  | A3 | 5% PEG 6000   |                                      | 0.1 M MES pH 6.0                       |
| 120 | Grid Screen PEG 6K  | A4 | 5% PEG 6000   |                                      | 0.1 M HEPES pH 7.0                     |
| 121 | Grid Screen PEG 6K  | A5 | 5% PEG 6000   |                                      | 0.1 M Tris pH 8.0                      |
| 122 | Grid Screen PEG 6K  | A6 | 5% PEG 6000   |                                      | 0.1 M Bicine pH 9.0                    |
| 123 | Grid Screen PEG 6K  | B2 | 10% PEG 6000  |                                      | 0.1 M citrate pH 5.0                   |
| 124 | Grid Screen PEG 6K  | B3 | 10% PEG 6000  |                                      | 0.1 M MES pH 6.0                       |
| 125 | Grid Screen PEG 6K  | B4 | 10% PEG 6000  |                                      | 0.1 M HEPES pH 7.0                     |
| 126 | Grid Screen PEG 6K  | B5 | 10% PEG 6000  |                                      | 0.1 M Tris pH 8.0                      |
| 127 | Grid Screen PEG 6K  | B6 | 10% PEG 6000  |                                      | 0.1 M Bicine pH 9.0                    |
| 128 | Grid Screen PEG 6K  | C2 | 20% PEG 6000  |                                      | 0.1 M citrate pH 5.0                   |
| 129 | Grid Screen PEG 6K  | C3 | 20% PEG 6000  |                                      | 0.1 M MES pH 6.0                       |

|     |                    |    |                  |                                  |                        |
|-----|--------------------|----|------------------|----------------------------------|------------------------|
| 130 | Grid Screen PEG 6K | C4 | 20% PEG 6000     |                                  | 0.1 M HEPES pH 7.0     |
| 131 | Grid Screen PEG 6K | C5 | 20% PEG 6000     |                                  | 0.1 M Tris pH 8.0      |
| 132 | Grid Screen PEG 6K | C6 | 20% PEG 6000     |                                  | 0.1 M Bicine pH 9.0    |
| 133 | Grid Screen PEG 6K | D2 | 30% PEG 6000     |                                  | 0.1 M citrate pH 5.0   |
| 134 | Grid Screen PEG 6K | D3 | 30% PEG 6000     |                                  | 0.1 M MES pH 6.0       |
| 135 | Grid Screen PEG 6K | D4 | 30% PEG 6000     |                                  | 0.1 M HEPES pH 7.0     |
| 136 | Grid Screen PEG 6K | D5 | 30% PEG 6000     |                                  | 0.1 M Tris pH 8.0      |
| 137 | Grid Screen PEG 6K | D6 | 30% PEG 6000     |                                  | 0.1 M Bicine pH 9.0    |
| 138 | Index              | 36 | 2% PEG 3350      | 15% tacsimate                    | 0.1 M HEPES pH 7.0     |
| 139 | Index              | 37 | 25% PEG 1500     |                                  |                        |
| 140 | Index              | 42 | 25% PEG 3350     |                                  | 0.1 M Bis-Tris pH 5.5  |
| 141 | Index              | 43 | 25% PEG 3350     |                                  | 0.1 M Bis-Tris pH 6.5  |
| 142 | Index              | 44 | 25% PEG 3350     |                                  | 0.1 M HEPES pH 7.5     |
| 143 | Index              | 45 | 25% PEG 3350     |                                  | 0.1 M Tris pH 8.5      |
| 144 | Index              | 46 | 20% PEG 5000 MME |                                  | 0.1 M Bis-Tris pH 6.5  |
| 145 | Index              | 47 | 28% PEG 2000 MME |                                  | 0.1 M Bis-Tris pH 6.5  |
| 146 | Index              | 54 | 30% PEG 550 MME  | 0.05 M CaCl <sub>2</sub>         | 0.1 M Bis-Tris pH 6.5  |
| 147 | Index              | 55 | 30% PEG 550 MME  | 0.05 M MgCl <sub>2</sub>         | 0.1 M HEPES pH 7.5     |
| 148 | Index              | 58 | 45% PPG P 400    |                                  | 0.05 M Bis-Tris pH 6.5 |
| 149 | Index              | 61 | 10% PEG 3350     | 0.2 M L-proline                  | 0.1 M HEPES pH 7.5     |
| 150 | Index              | 62 | 20% PEG 2000 MME | 0.2 M trimethylamine N-oxide     | 0.1 M Tris pH 8.5      |
| 151 | Index              | 63 | 10% PEG 5000 MME | 5% tacsimate                     | 0.1 M HEPES pH 7.0     |
| 152 | Index              | 65 | 17% PEG 10000    | 0.1 M (NH <sub>4</sub> ) acetate | 0.1 M Bis-Tris pH 5.5  |

|     |       |    |              |                                                          |                                                      |
|-----|-------|----|--------------|----------------------------------------------------------|------------------------------------------------------|
| 153 | Index | 66 | 25% PEG 3350 | 0.2 M (NH <sub>4</sub> ) <sub>2</sub> (SO <sub>2</sub> ) | 0.1 M Bis-Tris pH 5.5                                |
| 154 | Index | 67 | 25% PEG 3350 | 0.2 M (NH <sub>4</sub> ) <sub>2</sub> (SO <sub>2</sub> ) | 0.1 M Bis-Tris pH 6.5                                |
| 155 | Index | 68 | 25% PEG 3350 | 0.2 M (NH <sub>4</sub> ) <sub>2</sub> (SO <sub>2</sub> ) | 0.1 M HEPES pH 7.5                                   |
| 156 | Index | 69 | 25% PEG 3350 | 0.2 M (NH <sub>4</sub> ) <sub>2</sub> (SO <sub>2</sub> ) | 0.1 M Tris pH 8.5                                    |
| 157 | Index | 70 | 25% PEG 3350 | 0.2 M NaCl                                               | 0.1 M Bis-Tris pH 5.5                                |
| 158 | Index | 71 | 25% PEG 3350 | 0.2 M NaCl                                               | 0.1 M Bis-Tris pH 6.5                                |
| 159 | Index | 72 | 25% PEG 3350 | 0.2 M NaCl                                               | 0.1 M HEPES pH 7.5                                   |
| 160 | Index | 73 | 25% PEG 3350 | 0.2 M NaCl                                               | 0.1 M Tris pH 8.5                                    |
| 161 | Index | 74 | 25% PEG 3350 | 0.2 M Li <sub>2</sub> (SO <sub>4</sub> )                 | 0.1 M Bis-Tris pH 5.5                                |
| 162 | Index | 75 | 25% PEG 3350 | 0.2 M Li <sub>2</sub> (SO <sub>4</sub> )                 | 0.1 M Bis-Tris pH 6.5                                |
| 163 | Index | 76 | 25% PEG 3350 | 0.2 M Li <sub>2</sub> (SO <sub>4</sub> )                 | 0.1 M HEPES pH 7.5                                   |
| 164 | Index | 77 | 25% PEG 3350 | 0.2 M Li <sub>2</sub> (SO <sub>4</sub> )                 | 0.1 M Tris pH 8.5                                    |
| 165 | Index | 78 | 25% PEG 3350 | 0.2 M (NH <sub>4</sub> ) acetate                         | 0.1 M Bis-Tris pH 5.5                                |
| 166 | Index | 79 | 25% PEG 3350 | 0.2 M (NH <sub>4</sub> ) acetate                         | 0.1 M Bis-Tris pH 6.5                                |
| 167 | Index | 80 | 25% PEG 3350 | 0.2 M (NH <sub>4</sub> ) acetate                         | 0.1 M HEPES pH 7.5                                   |
| 168 | Index | 81 | 25% PEG 3350 | 0.2 M (NH <sub>4</sub> ) acetate                         | 0.1 M Tris pH 8.5                                    |
| 169 | Index | 82 | 25% PEG 3350 | 0.2 M MgCl <sub>2</sub>                                  | 0.1 M Bis-Tris pH 5.5                                |
| 170 | Index | 83 | 25% PEG 3350 | 0.2 M MgCl <sub>2</sub>                                  | 0.1 M Bis-Tris pH 6.5                                |
| 171 | Index | 84 | 25% PEG 3350 | 0.2 M MgCl <sub>2</sub>                                  | 0.1 M HEPES pH 7.5                                   |
| 172 | Index | 85 | 25% PEG 3350 | 0.2 M MgCl <sub>2</sub>                                  | 0.1 M Tris pH 8.5                                    |
| 173 | Index | 86 | 20% PEG 3350 | 0.2 M K/Na tartate                                       |                                                      |
| 174 | Index | 87 | 20% PEG 3350 |                                                          | 0.2 M Na Malonate pH 7.0                             |
| 175 | Index | 88 | 20% PEG 3350 |                                                          | 0.2 M (NH <sub>4</sub> ) <sub>3</sub> citrate pH 7.0 |

|     |        |    |                  |                                                          |                              |                             |
|-----|--------|----|------------------|----------------------------------------------------------|------------------------------|-----------------------------|
| 176 | Index  | 89 | 15% PEG 3350     |                                                          |                              | 0.1 M succinic acid pH 7.0  |
| 177 | Index  | 90 | 20% PEG 3350     | 0.2 M Na formate                                         |                              |                             |
| 178 | Index  | 91 | 20% PEG 3350     |                                                          |                              | 0.15 M DL-malic acid pH 7.0 |
| 179 | Index  | 92 | 15% PEG 3350     | 0.1 M Mg formate                                         |                              |                             |
| 180 | Index  | 94 | 20% PEG 3350     | 0.2 M Na <sub>3</sub> citrate                            |                              |                             |
| 181 | Index  | 95 | 30% PEG 2000 MME | 0.1 M K(SCN)                                             |                              |                             |
| 182 | Index  | 96 | 30% PEG 2000 MME | 0.15 M KBr                                               |                              |                             |
| 183 | Natrix | 4  | 10% PEG 400      | 0.2 M KCl                                                | 0.01 M Mg(SO <sub>4</sub> )  | 0.05 M MES pH 5.6           |
| 184 | Natrix | 5  | 5% PEG 8000      | 0.2 M KCl                                                | 0.01 M MgCl <sub>2</sub>     | 0.05 M MES pH 5.6           |
| 185 | Natrix | 6  | 20% PEG 8000     | 0.1 M (NH <sub>4</sub> ) <sub>2</sub> (SO <sub>2</sub> ) | 0.01 M MgCl <sub>2</sub>     | 0.05 M MES pH 5.6           |
| 186 | Natrix | 9  | 10% PEG 400      | 0.1 M KCl                                                | 0.01 M MgCl <sub>2</sub>     | 0.05 M MES pH 6.0           |
| 187 | Natrix | 10 | 5% PEG 4000      | 0.005 M Mg(SO <sub>4</sub> )                             |                              | 0.05 M MES pH 6.0           |
| 188 | Natrix | 17 | 10% PEG 4000     | 0.2 M KCl                                                | 0.01 M CaCl <sub>2</sub>     | 0.05 M cacodylate pH 6.0    |
| 189 | Natrix | 22 | 15% PEG 400      | 0.08 M Mg acetate                                        |                              | 0.05 M cacodylate pH 6.5    |
| 190 | Natrix | 23 | 10% PEG 4000     | 0.2 M KCl                                                | 0.01 M MgCl <sub>2</sub>     | 0.05 M cacodylate pH 6.5    |
| 191 | Natrix | 24 | 10% PEG 4000     | 0.2 M (NH <sub>4</sub> ) acetate                         | 0.01 M CaCl <sub>2</sub>     | 0.05 M cacodylate pH 6.5    |
| 192 | Natrix | 25 | 30% PEG 4000     | 0.08 M Mg acetate                                        |                              | 0.05 M cacodylate pH 6.5    |
| 193 | Natrix | 26 | 10% PEG 8000     | 0.2 M KCl                                                | 0.1 M Mg acetate             | 0.05 M cacodylate pH 6.5    |
| 194 | Natrix | 27 | 30% PEG 8000     | 0.2 M (NH <sub>4</sub> ) acetate                         | 0.01 M Mg acetate            | 0.05 M cacodylate pH 6.5    |
| 195 | Natrix | 31 | 25% PEG 550 MME  |                                                          | 0.005 M MgCl <sub>2</sub>    | 0.05 M HEPES pH 7.0         |
| 196 | Natrix | 35 | 5% PEG 400       | 0.1 M KCl                                                | 0.01 M MgCl <sub>2</sub>     | 0.05 M HEPES pH 7.0         |
| 197 | Natrix | 36 | 10% PEG 400      | 0.1 M KCl                                                | 0.01 M CaCl <sub>2</sub>     | 0.05 M HEPES pH 7.0         |
| 198 | Natrix | 37 | 20% PEG 200      | 0.2 M KCl                                                | 0.025 M Mg(SO <sub>4</sub> ) | 0.05 M HEPES pH 7.0         |

|     |           |    |                  |                                          |                           |                             |
|-----|-----------|----|------------------|------------------------------------------|---------------------------|-----------------------------|
| 199 | Natrix    | 38 | 5% PEG 4000      | 0.2 M (NH <sub>4</sub> ) acetate         | 0.15 M Mg acetate         | 0.05 M HEPES pH 7.0         |
| 200 | Natrix    | 39 | 5% PEG 8000      | 0.1 M (NH <sub>4</sub> ) acetate         | 0.02 M MgCl <sub>2</sub>  | 0.05 M HEPES pH 7.0         |
| 201 | Natrix    | 41 | 10% PEG 550 MME  | 0.1 M KCl                                | 0.015 M MgCl <sub>2</sub> | 0.05 M Tris pH 7.5          |
| 202 | Natrix    | 44 | 10% PEG 4000     | 0.2 M KCl                                | 0.05 M MgCl <sub>2</sub>  | 0.05 M Tris pH 7.5          |
| 203 | Natrix    | 47 | 30% PEG 400      | 0.1 M KCl                                | 0.01 M MgCl <sub>2</sub>  | 0.05 M Tris pH 8.5          |
| 204 | Natrix    | 48 | 30% PEG 4000     | 0.2 M (NH <sub>4</sub> )Cl               | 0.01 M CaCl <sub>2</sub>  | 0.05 M Tris pH 8.5          |
| 205 | Wizard I  | 5  | 30% PEG 400      |                                          |                           | 0.2 M CAPS pH 10.5          |
| 206 | Wizard I  | 6  | 20% PEG 3000     |                                          |                           | 0.2 M citrate pH 5.5        |
| 207 | Wizard I  | 10 | 20% PEG 2000 MME |                                          |                           | 0.2 M Tris pH 7.0           |
| 208 | Wizard I  | 12 | 20% PEG 1000     | 0.2 M Ca acetate                         |                           | 0.2 M imidazole pH 8.0      |
| 209 | Wizard I  | 15 | 10% PEG 3000     | 0.2 M Li <sub>2</sub> (SO <sub>4</sub> ) |                           | 0.2 M imidazole pH 8.0      |
| 210 | Wizard I  | 19 | 20% PEG 1000     |                                          |                           | 0.2 M Tris pH 7.0           |
| 211 | Wizard I  | 25 | 30% PEG 400      | 0.2 M MgCl <sub>2</sub>                  |                           | 0.2 M Tris pH 8.5           |
| 212 | Wizard I  | 26 | 10% PEG 3000     |                                          |                           | 0.2 M CHES pH 9.5           |
| 213 | Wizard I  | 28 | 20% PEG 3000     | 0.2 M NaCl                               |                           | 0.2 M HEPES pH 7.5          |
| 214 | Wizard I  | 29 | 10% PEG 8000     | 0.2 M NaCl                               |                           | 0.2 M CHES pH 9.5           |
| 215 | Wizard I  | 32 | 10% PEG 3000     |                                          |                           | 0.2 M Na/K phosphate pH 6.2 |
| 216 | Wizard I  | 41 | 30% PEG 3000     |                                          |                           | 0.2 M CHES pH 9.5           |
| 217 | Wizard I  | 46 | 10% PEG 8000     | 0.2 M Ca acetate                         |                           | 0.2 M imidazole pH 8.0      |
| 218 | Wizard II | 3  | 20% PEG 8000     | 0.2 M MgCl <sub>2</sub>                  |                           | 0.2 M Tris pH 8.5           |
| 219 | Wizard II | 7  | 30% PEG 3000     | 0.2 M NaCl                               |                           | 0.2 M Tris pH 7.0           |
| 220 | Wizard II | 8  | 10% PEG 8000     | 0.2 M NaCl                               |                           | 0.2 M Na/K phosphate pH 6.2 |
| 221 | Wizard II | 12 | 30% PEG 400      | 0.2 M Li <sub>2</sub> (SO <sub>4</sub> ) |                           | 0.2 M cacodylate pH 6.5     |

|     |            |    |               |                                                        |              |                             |
|-----|------------|----|---------------|--------------------------------------------------------|--------------|-----------------------------|
| 222 | Wizard II  | 14 | 20% PEG 1000  | 0.2 M NaCl                                             |              | 0.2 M Na/K phosphate pH 6.2 |
| 223 | Wizard II  | 18 | 20% PEG 3000  | 0.2 M Ca acetate                                       |              | 0.2 M Tris pH 7.0           |
| 224 | Wizard II  | 24 | 30% PEG 8000  | 0.2 M NaCl                                             |              | 0.2 M imidazole pH 8.0      |
| 225 | Wizard II  | 26 | 30% PEG 400   |                                                        |              | 0.2 M CHES pH 9.5           |
| 226 | Wizard II  | 27 | 10% PEG 3000  | 0.2 M MgCl <sub>2</sub>                                |              | 0.2 M cacodylate pH 6.5     |
| 227 | Wizard II  | 28 | 20% PEG 8000  | 0.2 M Ca acetate                                       |              | 0.2 M MES pH 6.0            |
| 228 | Wizard II  | 34 | 10% PEG 8000  |                                                        |              | 0.2 M imidazole pH 8.0      |
| 229 | Wizard II  | 39 | 20% PEG 8000  | 0.2 M NaCl                                             |              | 0.2 M CAPS pH 10.5          |
| 230 | Wizard II  | 42 | 30% PEG 400   | 0.2 M NaCl                                             |              | 0.2 M HEPES pH 7.5          |
| 231 | Wizard II  | 43 | 10% PEG 8000  | 0.2 M MgCl <sub>2</sub>                                |              | 0.2 M Tris pH 7.0           |
| 232 | Wizard II  | 44 | 20% PEG 1000  | 0.2 M MgCl <sub>2</sub>                                |              | 0.2 M cacodylate pH 6.5     |
| 233 | Wizard III | 1  | 20% PEG 3350  | 0.2 M (NH <sub>4</sub> ) <sub>2</sub> citrate          |              |                             |
| 234 | Wizard III | 3  | 20% PEG 3350  | 0.2 M Mg formate                                       |              |                             |
| 235 | Wizard III | 4  | 20% PEG 3350  | 0.2 M (NH <sub>4</sub> ) formate                       |              |                             |
| 236 | Wizard III | 5  | 20% PEG 3350  | 0.2 M (NH <sub>4</sub> ) Cl                            |              |                             |
| 237 | Wizard III | 8  | 20% PEG 3350  | 0.2 M K(NO <sub>2</sub> )                              |              |                             |
| 238 | Wizard III | 10 | 20% PEG 3350  | 0.2 M Na (SCN)                                         |              |                             |
| 239 | Wizard III | 16 | 20% PEG 3350  | 0.2 M K <sub>3</sub> citrate                           |              |                             |
| 240 | Wizard III | 19 | 20% PEG 3350  | 0.2 M (NH <sub>4</sub> )(NO <sub>2</sub> )             |              |                             |
| 241 | Wizard III | 26 | 24% PEG 1500  |                                                        | 20% glycerol |                             |
| 242 | Wizard III | 30 | 5.5% PEG 4000 | 0.17 M (NH <sub>4</sub> ) <sub>2</sub> SO <sub>2</sub> | 15% glycerol |                             |
| 243 | Wizard III | 32 | 16% PEG 8000  | 0.04 M K phosphate                                     | 20% glycerol |                             |
| 244 | Wizard III | 35 | 4.4% PEG 8000 | 0.16 M Ca acetate                                      | 20% glycerol | 0.08 M cacodylate pH 6.5    |

|     |            |    |                  |                                          |            |                      |
|-----|------------|----|------------------|------------------------------------------|------------|----------------------|
| 245 | Wizard III | 38 | 15% PEG 10000    |                                          | 2% dioxane | 0.1 M citrate pH 5.5 |
| 246 | Wizard III | 44 | 30% PEG 5000 MME | 0.2 M Li <sub>2</sub> (SO <sub>4</sub> ) |            | 0.1 M Tris pH 8.0    |
| 247 | JBScreen 1 | A2 | 15% PEG 400      |                                          |            | 0.1 M MES pH 6.5     |
| 248 | JBScreen 1 | A6 | 25% PEG 400      | 0.2 M Li <sub>2</sub> (SO <sub>4</sub> ) |            | 0.1 M Tris pH 8.5    |
| 249 | JBScreen 1 | B3 | 30% PEG 400      | 0.1 M Na acetate                         |            | 0.1 M MES pH 6.5     |
| 250 | JBScreen 1 | B4 | 30% PEG 400      | 0.1 M MgCl <sub>2</sub>                  |            | 0.1 M MES pH 6.5     |
| 251 | JBScreen 1 | C3 | 25% PEG 1000     |                                          |            | 0.1 M HEPES pH 7.5   |
| 252 | JBScreen 1 | C4 | 30% PEG 1000     |                                          |            | 0.1 M Tris pH 8.5    |
| 253 | JBScreen 1 | C6 | 20% PEG 1500     |                                          |            | 0.1 M HEPES pH 7.5   |
| 254 | JBScreen 1 | D3 | 25% PEG 2000 MME |                                          |            |                      |
| 255 | JBScreen 1 | D4 | 30% PEG 2000 MME | 0.1 M Na acetate                         |            | 0.1 M MES pH 6.5     |
| 256 | JBScreen 1 | D5 | 20% PEG 3000     | 0.2 M Na acetate                         |            | 0.1 M HEPES pH 7.5   |
| 257 | JBScreen 1 | D6 | 30% PEG 3000     | 0.2 M Li <sub>2</sub> (SO <sub>4</sub> ) |            | 0.1 M Tris pH 8.5    |
| 258 | JBScreen 2 | A2 | 8% PEG 4000      |                                          |            |                      |
| 259 | JBScreen 2 | A4 | 10% PEG 4000     | 0.2 M MgCl <sub>2</sub>                  |            | 0.1 M MES pH 6.5     |
| 260 | JBScreen 2 | A5 | 12% PEG 4000     | 0.1 M Na acetate                         |            | 0.1 M HEPES pH 7.5   |
| 261 | JBScreen 2 | A6 | 12% PEG 4000     |                                          |            | 0.1 M Tris pH 8.5    |
| 262 | JBScreen 2 | B3 | 16% PEG 4000     | 0.2 M MgCl <sub>2</sub>                  |            | 0.1 M Tris pH 8.5    |
| 263 | JBScreen 2 | B5 | 20% PEG 4000     | 0.2 M Li <sub>2</sub> (SO <sub>4</sub> ) |            | 0.1 M Tris pH 8.5    |
| 264 | JBScreen 2 | B6 | 20% PEG 4000     | 0.2 M CaCl <sub>2</sub>                  |            | 0.1 M Tris pH 8.5    |
| 265 | JBScreen 2 | C1 | 22% PEG 4000     | 0.1 M Na acetate                         |            | 0.1 M HEPES pH 7.5   |
| 266 | JBScreen 2 | C3 | 25% PEG 4000     | 0.2 M MgCl <sub>2</sub>                  |            | 0.1 M MES pH 6.5     |
| 267 | JBScreen 2 | C4 | 25% PEG 4000     | 0.2 M CaCl <sub>2</sub>                  |            | 0.1 M Tris pH 8.5    |

|     |            |    |                  |                                                       |                  |                      |
|-----|------------|----|------------------|-------------------------------------------------------|------------------|----------------------|
| 268 | JBScreen 2 | C5 | 30% PEG 4000     |                                                       |                  |                      |
| 269 | JBScreen 2 | D1 | 30% PEG 4000     |                                                       |                  | 0.1 M MES pH 6.5     |
| 270 | JBScreen 2 | D2 | 30% PEG 4000     | 0.2 M CaCl <sub>2</sub>                               |                  | 0.1 M HEPES pH 7.5   |
| 271 | JBScreen 3 | A1 | 8% PEG 4000      | 0.8 M LiCl                                            |                  | 0.1 M Tris pH 8.5    |
| 272 | JBScreen 3 | A2 | 10% PEG 4000     |                                                       | 20% 2-propanol   |                      |
| 273 | JBScreen 3 | A5 | 10% PEG 4000     |                                                       | 20% 2-propanol   | 0.1 M HEPES pH 7.5   |
| 274 | JBScreen 3 | B2 | 15% PEG 4000     | 0.2 M (NH <sub>4</sub> ) <sub>2</sub> SO <sub>2</sub> |                  | 0.1 M citrate pH 5.6 |
| 275 | JBScreen 3 | B3 | 16% PEG 4000     | 0.2 M (NH <sub>4</sub> ) <sub>2</sub> SO <sub>2</sub> | 10% 2-propanol   | 0.1 M HEPES pH 7.5   |
| 276 | JBScreen 3 | B4 | 20% PEG 4000     | 0.2 M (NH <sub>4</sub> ) <sub>2</sub> SO <sub>2</sub> |                  |                      |
| 277 | JBScreen 3 | B5 | 20% PEG 4000     | 0.2 M Mg(SO <sub>2</sub> )                            | 10% glycerol     |                      |
| 278 | JBScreen 3 | B6 | 20% PEG 4000     | 0.1 M Na citrate                                      | 5% 2-propanol    |                      |
| 279 | JBScreen 3 | C1 | 20% PEG 4000     | 0.1 M Na citrate                                      | 20% 2-propanol   |                      |
| 280 | JBScreen 3 | C2 | 20% PEG 4000     | 0.6 M NaCl                                            |                  | 0.1 M MES pH 6.5     |
| 281 | JBScreen 3 | C4 | 22% PEG 4000     | 0.2 M (NH <sub>4</sub> ) <sub>2</sub> SO <sub>2</sub> | 0.1 M Na acetate |                      |
| 282 | JBScreen 3 | C6 | 25% PEG 4000     | 0.2 M (NH <sub>4</sub> ) <sub>2</sub> SO <sub>2</sub> |                  | 0.1 M citrate pH 5.6 |
| 283 | JBScreen 3 | D1 | 25% PEG 4000     | 0.2 M Li <sub>2</sub> (SO <sub>4</sub> )              | 0.1 M Na acetate | 0.1 M HEPES pH 7.5   |
| 284 | JBScreen 3 | D2 | 25% PEG 4000     | 0.1 M Na acetate                                      | 8% 2-propanol    |                      |
| 285 | JBScreen 3 | D5 | 30% PEG 4000     | 0.1 M (NH <sub>4</sub> ) <sub>2</sub> SO <sub>2</sub> |                  | 0.1 M citrate pH 5.6 |
| 286 | JBScreen 3 | D6 | 32% PEG 4000     | 0.8 M LiCl                                            |                  | 0.1 M Tris pH 8.5    |
| 287 | JBScreen 4 | A1 | 25% PEG 5000 MME | 0.2 M Li <sub>2</sub> (SO <sub>4</sub> )              |                  | 0.1 M Tris pH 8.5    |
| 288 | JBScreen 4 | A3 | 3% PEG 6000      | 0.1 M KCl                                             |                  | 0.1 M Tris pH 8.5    |
| 289 | JBScreen 4 | A4 | 10% PEG 6000     | 0.01 M MgCl <sub>2</sub>                              |                  |                      |
| 290 | JBScreen 4 | A6 | 15% PEG 6000     |                                                       | 5% glycerol      |                      |

|     |            |    |               |                                                       |                                                        |                        |
|-----|------------|----|---------------|-------------------------------------------------------|--------------------------------------------------------|------------------------|
| 291 | JBScreen 4 | B1 | 15% PEG 6000  | 0.05 M KCl                                            | 0.01 M MgCl <sub>2</sub>                               |                        |
| 292 | JBScreen 4 | B2 | 16% PEG 6000  | 0.01 M Na citrate                                     |                                                        |                        |
| 293 | JBScreen 4 | B3 | 20% PEG 6000  |                                                       |                                                        | 0.05 M imidazole pH 8  |
| 294 | JBScreen 4 | B4 | 25% PEG 6000  | 0.1 M LiCl                                            |                                                        | 0.1 M HEPES pH 7.5     |
| 295 | JBScreen 4 | B5 | 28% PEG 6000  | 0.5 M LiCl                                            |                                                        | 0.1 M Tris pH 8.5      |
| 296 | JBScreen 4 | B6 | 30% PEG 6000  | 1 M LiCl                                              | 0.1 M Na acetate                                       |                        |
| 297 | JBScreen 4 | C1 | 33% PEG 6000  | 0.01 M Na citrate                                     |                                                        |                        |
| 298 | JBScreen 4 | C4 | 4% PEG 8000   |                                                       |                                                        |                        |
| 299 | JBScreen 4 | C5 | 8% PEG 8000   | 0.2 M LiCl                                            | 0.05 M Mg(SO <sub>4</sub> )                            |                        |
| 300 | JBScreen 4 | D2 | 10% PEG 8000  | 0.2 M Ca acetate                                      |                                                        | 0.1 M HEPES pH 7.5     |
| 301 | JBScreen 4 | D3 | 10% PEG 8000  | 0.1 M Na acetate                                      | 0.05 M Mg acetate                                      |                        |
| 302 | JBScreen 4 | D4 | 10% PEG 8000  | 0.2 M Mg acetate                                      |                                                        |                        |
| 303 | JBScreen 5 | A1 | 12% PEG 8000  | 0.1 M KCl                                             | 5% glycerol                                            |                        |
| 304 | JBScreen 5 | A2 | 12% PEG 8000  | 0.5 M KCl                                             | 10% glycerol                                           |                        |
| 305 | JBScreen 5 | A6 | 15% PEG 8000  | 0.1 M Na citrate                                      | 0.05 M (NH <sub>4</sub> ) <sub>2</sub> SO <sub>2</sub> |                        |
| 306 | JBScreen 5 | B1 | 18% PEG 8000  | 0.2 M Ca acetate                                      |                                                        | 0.1 M HEPES pH 7.5     |
| 307 | JBScreen 5 | B2 | 18% PEG 8000  | 0.1 M Na acetate                                      | 2% 2-propanol                                          | 0.1 M HEPES pH 7.5     |
| 308 | JBScreen 5 | B3 | 18% PEG 8000  | 0.2 M Li <sub>2</sub> (SO <sub>4</sub> )              |                                                        | 0.1 M Tris pH 8.5      |
| 309 | JBScreen 5 | B4 | 20% PEG 8000  |                                                       |                                                        | 0.1 M HEPES pH 7.5     |
| 310 | JBScreen 5 | B6 | 20% PEG 8000  |                                                       |                                                        | 0.1 M CHES pH 9.5      |
| 311 | JBScreen 5 | C1 | 22% PEG 8000  | 0.2 M (NH <sub>4</sub> ) <sub>2</sub> SO <sub>2</sub> |                                                        | 0.1 M MES pH 6.5       |
| 312 | JBScreen 5 | C2 | 25% PEG 8000  | 0.2 M LiCl                                            |                                                        |                        |
| 313 | JBScreen 5 | C5 | 14% PEG 10000 |                                                       |                                                        | 0.1 M imidazole pH 8.0 |

|     |                 |    |               |                         |              |                         |
|-----|-----------------|----|---------------|-------------------------|--------------|-------------------------|
| 314 | JBScreen 5      | C6 | 16% PEG 10000 |                         | 20% glycerol | 0.1 M Tris pH 8.5       |
| 315 | JBScreen 5      | D1 | 18% PEG 10000 | 0.1 M NaCl              |              | 0.1 M Tris pH 8.5       |
| 316 | JBScreen 5      | D3 | 30% PEG 10000 |                         |              | 0.1 M Tris pH 8.5       |
| 317 | JBScreen 5      | D5 | 17% PEG 20000 | 0.1 M MgCl <sub>2</sub> |              | 0.1 M Tris pH 8.5       |
| 318 | JBScreen 5      | D6 | 20% PEG 20000 |                         |              |                         |
| 319 | Grid Screen MPD | A2 | 10% MPD       |                         |              | 0.1 M Na acetate pH 5.0 |
| 320 | Grid Screen MPD | A3 | 10% MPD       |                         |              | 0.1 M MES pH 6.0        |
| 321 | Grid Screen MPD | A4 | 10% MPD       |                         |              | 0.1 M HEPES pH 7.0      |
| 322 | Grid Screen MPD | A5 | 10% MPD       |                         |              | 0.1 M Tris pH 8.0       |
| 323 | Grid Screen MPD | A6 | 10% MPD       |                         |              | 0.1 M Bicine pH 9.0     |
| 324 | Grid Screen MPD | B2 | 20% MPD       |                         |              | 0.1 M Na acetate pH 5.0 |
| 325 | Grid Screen MPD | B3 | 20% MPD       |                         |              | 0.1 M MES pH 6.0        |
| 326 | Grid Screen MPD | B4 | 20% MPD       |                         |              | 0.1 M HEPES pH 7.0      |
| 327 | Grid Screen MPD | B5 | 20% MPD       |                         |              | 0.1 M Tris pH 8.0       |
| 328 | Grid Screen MPD | B6 | 20% MPD       |                         |              | 0.1 M Bicine pH 9.0     |
| 329 | Grid Screen MPD | C2 | 40% MPD       |                         |              | 0.1 M Na acetate pH 5.0 |
| 330 | Grid Screen MPD | C3 | 40% MPD       |                         |              | 0.1 M MES pH 6.0        |
| 331 | Grid Screen MPD | C4 | 40% MPD       |                         |              | 0.1 M HEPES pH 7.0      |
| 332 | Grid Screen MPD | C5 | 40% MPD       |                         |              | 0.1 M Tris pH 8.0       |
| 333 | Grid Screen MPD | C6 | 40% MPD       |                         |              | 0.1 M Bicine pH 9.0     |
| 334 | Grid Screen MPD | D2 | 65% MPD       |                         |              | 0.1 M Na acetate pH 5.0 |
| 335 | Grid Screen MPD | D3 | 65% MPD       |                         |              | 0.1 M MES pH 6.0        |
| 336 | Grid Screen MPD | D4 | 65% MPD       |                         |              | 0.1 M HEPES pH 7.0      |

|     |                 |    |         |                     |
|-----|-----------------|----|---------|---------------------|
| 337 | Grid Screen MPD | D5 | 65% MPD | 0.1 M Tris pH 8.0   |
| 338 | Grid Screen MPD | D6 | 65% MPD | 0.1 M Bicine pH 9.0 |

---
